# Supplementary material for: Kelp Forest model development in the Coupled Ocean-Atmosphere-Wave-Sediment-Transport model (COAWST V3.4)
Source: Copernicus journal article supplement (doi:10.5194/egusphere-2023-2330), 2023-11-30
Supplement: Supplementary file 1 [file egusphere-2023-2330-supplement.pdf]

1 Supporting information for “**Kelp Forest model development in a regional ocean**  
2 **model”**

3

4 Fagundes, Matheus<sup>1</sup>; Micheli, Fiorenza<sup>2,3</sup>; Monismith, Stephen G.<sup>4</sup>; Valle-Levinson, Arnaldo<sup>5</sup>; Woodson,  
5 C. Brock<sup>1</sup>

6 <sup>1</sup> Department of Engineering, University of Georgia, Athens, GA, USA

7 <sup>2</sup> Ocean Department, Hopkins Marine Station, Stanford University, Pacific Grove, CA, USA

8 <sup>3</sup> Stanford Center for Ocean Solutions, Pacific Grove, CA, USA

9 <sup>4</sup> Monterey Bay Aquarium Research Institute, Moss Landing, CA, USA

10 <sup>5</sup> Civil and Coastal Engineering Department, University of Florida, Gainesville, FL, USA

11

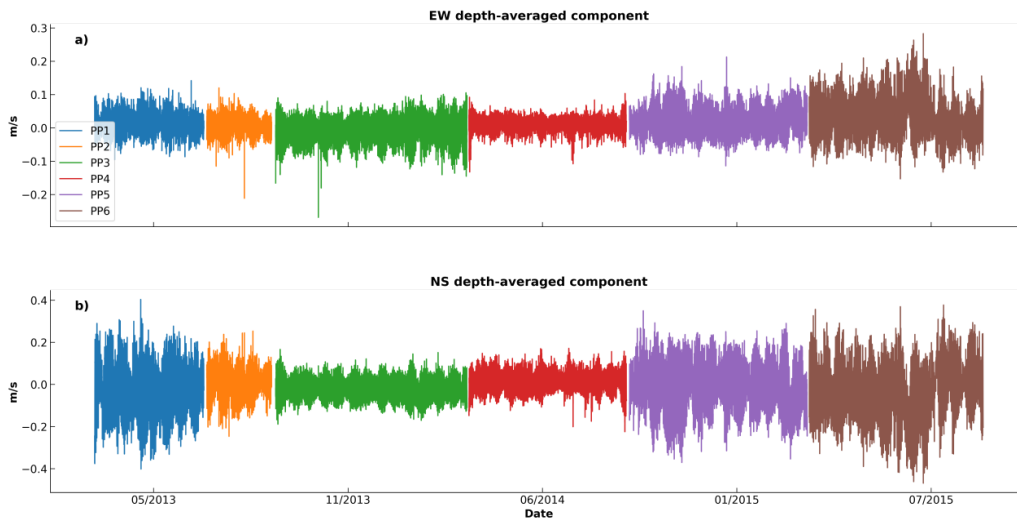

12

13 Supplementary Figure 1 - EW and NS depth-averaged velocity components for 6 different periods at Punta

14 Prieta (PP), Isla Natividad, MX.

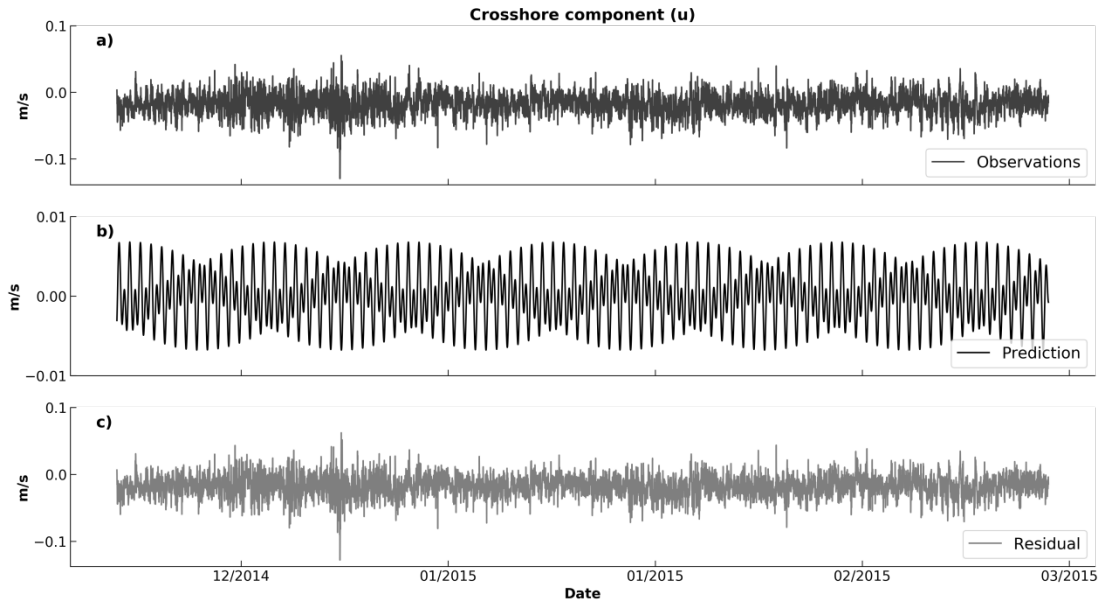

15

16 Supplementary Figure 2 - Cross-shore component for winter 2015 in PP. From top to bottom: Observations

17 (a) based on Fig. 5, prediction using t-tide (b), data residuals (c).

18

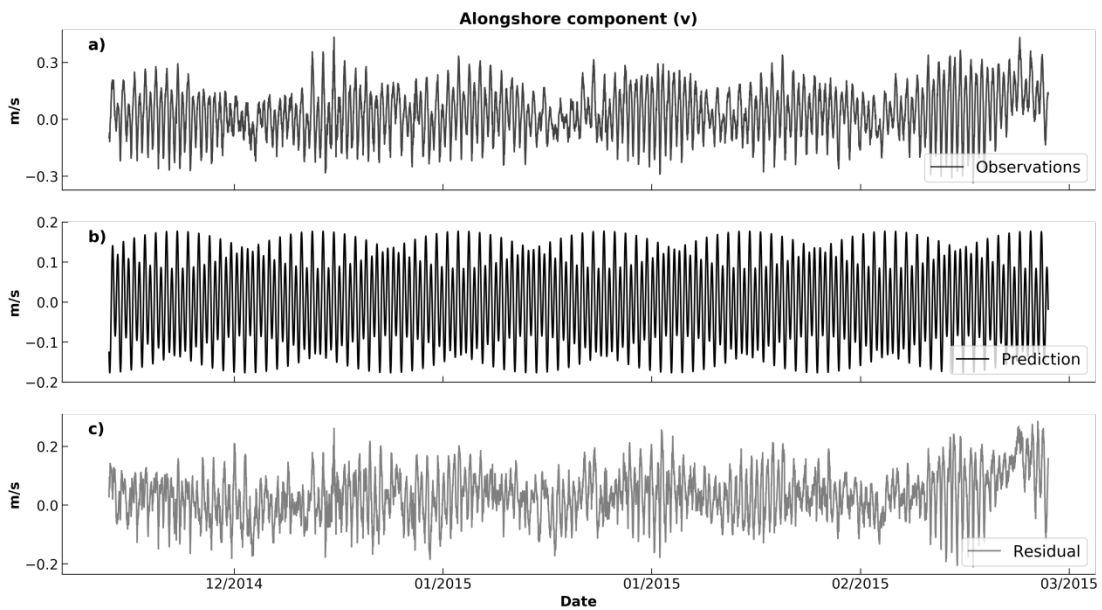

19

20 Supplementary Figure 3 - Along-shore component for winter 2015 in PP. From top to bottom: Observations

21 (a) based on Fig. 5, prediction using t-tide (b), and data residuals (c).

22
