# Supplementary material for: Kelp Forest model development in the Coupled Ocean-Atmosphere-Wave-Sediment-Transport model (COAWST V3.4)
Source: Copernicus journal article supplement (doi:10.5194/egusphere-2023-2330), 2023-11-30
Supplement: Supplementary file [file egusphere-2023-2330-RC2-supplement.pdf]

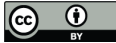

1     **Kelp Forest model development in the *Coupled Ocean-Atmosphere-Wave-***  
2                                    ***Sediment-Transport model (COAWST V3.4)***

3

4     Matheus Fagundes<sup>1</sup>; Fiorenza Micheli<sup>2,3</sup>; Stephen G. Monismith<sup>4</sup>; Arnoldo Valle-Levinson<sup>5</sup>; C. Brock  
5     Woodson<sup>1</sup>

6     <sup>1</sup>Department of Engineering, University of Georgia, Athens, GA, USA

7     <sup>2</sup>Ocean Department, Hopkins Marine Station, Stanford University, Pacific Grove, CA, USA

8     <sup>3</sup>Stanford Center for Ocean Solutions, Pacific Grove, CA, USA

9     <sup>4</sup>Monterey Bay Aquarium Research Institute, Moss Landing, CA, USA

10    <sup>5</sup>Civil and Coastal Engineering Department, University of Florida, Gainesville, FL, USA

11

12    Corresponding author:

13    Matheus Fagundes, mf99274@uga.edu

14

15                                    **ABSTRACT**

16    Kelp forests are essential ecosystems in coastal regions around the world. They have large  
17    effects on flow structure, biogeochemical processes, and ecological dynamics. However,  
18    studies have yet to simulate these ecosystems in either regional ocean or global climate models.

19    Here we describe and validate a model that simulates kelp forests in the water column for the  
20    ocean component of the *Coupled Ocean-Atmosphere-Wave-Sediment-Transport model*

21    (*COAWST V3.4*) using a simple yet efficient linear regression approach to simulate kelp  
22    canopies. An *in-situ* dataset of 2-1/2 years, with and without kelp forest coverage around Isla  
23    Natividad (Baja CA, MX), allowed model validation for the main tidal constituents. *We tested*  
24    *different* vegetation drag coefficients and compared simulations with our canopy model against

25    the standard vegetation module in *COAWST*. Results show that while both models simulate the  
26    velocities observed in the *in situ* dataset reasonably well, our model better represents turbulence

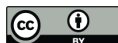

- 27 kinetic energy through the water column as observed in laboratory experiments. This new kelp
- 28 model can be helpful in ecology, physics, and biogeochemistry studies.



## 29 1 INTRODUCTION

30 Kelp forest ecosystems occupy almost  $7 \times 10^6$  km<sup>2</sup> globally, when accounting for polar regions  
31 of the world's coastlines (Duarte, 2017; Macreadie *et al.*, 2019; Wernberg *et al.*, 2019),  
32 representing the largest coastal vegetated ecosystem in the world. Kelp lives in nutrient-rich  
33 habitats such as Eastern Boundary currents (EBUs) and provides significant global carbon  
34 sequestration either through respiration or carbon burial (Mcleod *et al.*, 2011; Britton *et al.*, 2016;  
35 Low *et al.*, 2021, Eger *et al.*, 2023). While kelp forests are important for global carbon  
36 sequestration (Macreadie *et al.*, 2019), kelp forests also have local biological (Gaylord *et al.*, 2002;  
37 Steneck *et al.*, 2003) and physical impacts (Gaylord *et al.*, 2007) that have been observed *in situ*  
38 (Walter *et al.*, 2012; Leary *et al.*, 2017; Monismith *et al.*, 2022) and in laboratory experiments  
39 (Rosman *et al.*, 2010; Rosman *et al.*, 2013). Considering that kelp forests have ecological,  
40 biogeochemical, and physical importance, comparative efforts to simulate these ecosystems in  
41 ocean models have been limited. Up to now, only one study has attempted to include the physical  
42 response of flows due to kelp forests into an ocean model, and it did not specifically account for  
43 variation in kelp canopy (Wu *et al.*, 2017).

44 Kelp forests are found worldwide (Delille *et al.*, 2009; Schiel and Foster, 2011; Krause-Jensen *et*  
45 *al.*, 2016) and composed of 5 recognized types based on dominant genus: Ecklonia, Nereocystis,  
46 Lessonia, Laminaria, and Macrocystis (Rafaelli & Hawkins, 1999). Along the west coast of North  
47 America, the predominant species is the giant kelp *Macrocystis* spp. (Steneck *et al.*, 2002).  
48 *Macrocystis* spp. are found generally between 2 to 30 meters in the water column (Jackson &  
49 Winant, 1983) forming dense underwater forests (Steneck *et al.*, 2002) (Fig. 3.1). Kelp forests are  
50 recognized for their importance as shelter for macroinvertebrates, fish, and mammals (Dayton,  
51 1985; Rafaelli & Hawkins, 1999). Furthermore, kelp forests greatly impact carbon storage or net



52 primary productivity (NPP). A kelp forest can uptake up to 4-fold more carbon per year than a  
53 boreal forest (Reed & Brzezinski, 2009) or phytoplankton production in upwelling zones  
54 (Behrenfeld & Falkowski, 1997). Kelp forests account for almost 5% of the total global blue  
55 carbon and 1/3 of the total carbon sequestered in coastal regions (Filbee-Dexter & Wernberg, 2020;  
56 Eger *et al.*, 2023). Similarly, kelp forests alter currents and mixing in subtidal nearshore  
57 environments of temperate and high latitudes (Dayton, 1985; Rafaelli & Hawkins, 1999) and can  
58 dampen headland upwelling processes (Valle-Levinson *et al.*, 2022).

59

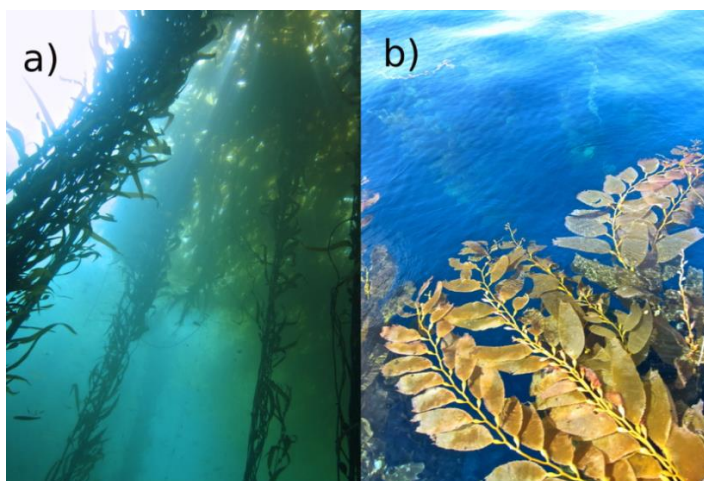

60

61 Figure 1 - Underwater formation of *M. Pyrifera* (a) and surface canopies at the surface (b). Source: Photos  
62 taken by Charles Boch and modified by Matheus Fagundes.

63

64 Previous studies to understand the effect of kelp forests on currents focused on particular regions  
65 along the California Current System (CCS; e.g: Jackson, 1984; Monismith *et al.*, 2022), scaled  
66 laboratory experiments (e.g: Rosman *et al.*, 2010), or high-resolution simulation of kelp beds (e.g:  
67 Wu *et al.*, 2017). While these studies helped better understand flow-vegetation interactions in these  
68 complex ecosystems, they did not capture the entire range of effects that kelp forests have on the



69 biology, biogeochemistry, and currents. In this present study, a high-resolution semi-idealized  
70 hydrodynamic model coupled with a vegetation module is used to create and validate a kelp  
71 module to allow for studies on the effects of kelp forests, not only on the hydrodynamics, but also  
72 the resultant effects on biogeochemical cycling and larval transport.

## 73 2 THEORY

74 The alongshore ( $v$ ) momentum term of the Reynolds-Averaged Navier-Stokes (RANS)  
75 equations under the Boussinesq approximation (Beudin *et al.*, 2017) can be written as:

$$76 \quad \frac{\partial v}{\partial t} + \frac{\partial vu}{\partial x} + \frac{\partial vv}{\partial y} + \frac{\partial vw}{\partial z} + fu = -\frac{1}{\rho_0} \frac{\partial P}{\partial y} - \frac{\partial}{\partial z} (\overline{u'w'}) - \nu \frac{\partial v}{\partial z} + D_v + F_v \quad (1)$$

77 where  $\frac{dv}{dt}$  is the unsteady term,  $\frac{d(uv)}{dx} + \frac{d(vv)}{dy} + \frac{d(vw)}{dz}$  are the advection terms,  $f$  is the Coriolis  
78 parameter,  $-\frac{1}{\rho_0} \frac{dP}{dy}$  is the pressure gradient in the  $y$ -direction,  $\rho_0$  is the reference density of  
79 seawater,  $\overline{u'w'}$  is the vertical flux of horizontal momentum by turbulent velocity fluctuations,  $\nu$  is  
80 the molecular viscosity,  $D_v$  is the horizontal diffusive term, and the last term ( $F_v$ ) is a forcing term  
81 that includes the effects of vegetation on the flow. The spatially averaged vegetation drag force for  
82 the alongshore velocity neglecting cross shore velocity can be written as:

$$83 \quad F_{d,veg,v} = \frac{1}{2} C_d p d P_d \sqrt{v^2} \quad (2)$$

84 Where  $P_d$  is plant density (plants  $m^{-2}$ ),  $pd$  is the width of kelp (m) or diameter in the case of kelp,  
85 and  $C_d$  is the drag coefficient for an individual plant. The code for the vegetation module in  
86 *COAWST* was originally written to represent seagrasses, which do not extend to the water surface,  
87 and therefore, no canopy was included. In these situations, the spacing between plants is constant  
88 to the surface (Fig. 2a). However, kelp forests can have extensive canopies that cover the last meter  
89 or so to the surface (Fig. 1; Traiger *et al.*, 2022). To date, the effects of surface canopies on currents



90 have only been studied in laboratory settings (Rosman *et al.*, 2013). However, kelp canopies can  
 91 be represented using a linear regression to allow individual plants to get closer together and the  
 92 kelp forest to become denser as the surface is approached (Fig. 2b). The second term important for  
 93 the development of our approach is plant thickness ( $pt$ ). The  $pt$  is inversely proportional to the  $pd$   
 94 in the second moment of area ( $I$ ) equation ( $=pdpt^3/12$ ) for the rectangle shape that was used by  
 95 Beudin *et al.*, (2017). While not ideal, we decided to keep the same equation for  $I$ .

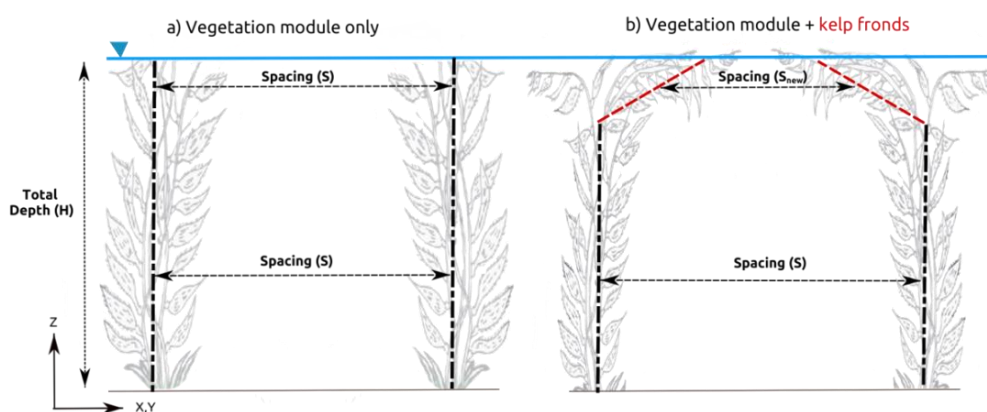

96  
97 Figure 2 - Schematic of the two simulations in COAWST.

### 98 3 METHODS

#### 99 3.1 Kelp canopy module

100 To account for kelp canopy, we developed a simple linear regression model that increases  $pt$  and  
 101  $pd$  near the surface as:

$$102 \begin{cases} pt = pd = 0.3 & \text{if } depth \leq 12m \\ pt = pd = 2.3 * depth - 27.3 & \text{if } depth > 12m \end{cases} \quad (3)$$

103 This modification in the vegetation model code captures the increase in kelp spacing ( $S$ ) at the  
 104 surface between individual kelp plants. For our scenario, this gives  $pt$  and  $pd$  equal to 2.3 at the  
 105 surface, forming a virtually solid boundary. The coefficients in (3) can be varied to adjust for the



106 density, extent of the canopy, or water depth accordingly. The values reported are specific setup  
107 to our model test case.

108 Two simulations are presented in this paper: The first simulation is running the *COAWST*  
109 vegetation module with no changes (*standard* hereafter) (Fig. 2a), and the second is modifying the  
110 code to account for kelp canopy (*canopy*) (Fig. 2b). The *standard* simulation assumes that  $pd$  and  
111  $pt$  are constant from the seafloor to the surface. The *canopy* simulation assumes a linear increase  
112 in  $pd$  and  $pt$  in the last meter of the water column (Fig. 3.2; Utter & Denny, 1996). The *canopy*  
113 module (eqn. 3) simulates the effects of kelp stipes and fronds getting close to each other ( $S$ ) as  
114 they spread out on the surface as they are longer than the water depth (Fig. 2b). The stipes and  
115 fronds are then represented by changing  $pd$  and  $pt$  and, consequently, the effects of kelp forests on  
116 the currents. These differences in  $pd$  and  $pt$  directly affect the bulk drag in the water column,  
117 consequently changing the depth-averaged velocity and turbulence.

### 118 3.2 Area of Study

119 This study focuses on kelp forests surrounding Isla Natividad in the Vizcaino Bay region of Baja  
120 California, MX. Baja California is affected by large scale forcings such as El Niño (Trenberth,  
121 1997) and marine heat waves (Cavanaugh *et al.*, 2010; McPherson *et al.*, 2021). Mesoscale  
122 forcings such as California Current characterized by low salinity, low temperature, high dissolved  
123 oxygen (DO) and California Undercurrent (CU) that is saltier, higher temperature and low in  
124 dissolved oxygen, also play a major role in the physical environment of this region (Mancilla-  
125 Peraza *et al.*, 1993). Seasonally, there is a marked stratification in the upper 20 meters of the water  
126 column, and conditions are influenced by wind-driven upwelling that brings water temperatures  
127 as low as 8°C, salinity (~33.8), and low DO (<5.5 ml/l) to the surface during spring/summer.  
128 During winter, waters can reach 16°C, salinity (~34), and DO around 5ml/l (Mancilla-Peraza *et*

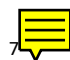



129 *al.*, 1993). Around Isla Natividad, winds, waves (surface and internal), tides, and kelp forests drive  
130 the dynamics (Woodson *et al.*, 2018; Valle-Levinson *et al.*, 2022) at relatively small spatial and  
131 temporal scales (e.g. < 1 km, < 24 h). For instance, the shape of kelp forests can modify tides and  
132 dampen headland upwelling (Valle-Levinson *et al.*, 2022).

133 Isla Natividad is a 7 km long island south of Isla Cedros in Central Baja California, Mexico  
134 (Schlenger *et al.*, 2021) located between 115°15'W-115°6'W and 27°48'N-27°55'12''N (Fig. 3).  
135 The island is bounded by Kellet Channel on the north and Dewey Channel on the south (Mancilla-  
136 Peraza *et al.*, 1993), and is surrounded year-round by kelp forests (*Macrocystis Pyrifera*) which  
137 provide shelter for organisms including abalones (*Haliotis* spp.; Micheli *et al.*, 2012). Isla  
138 Natividad has two distinct local ocean regions on each side of the island (Woodson, 2018). On the  
139 southeastern side, Morro Prieto can reach mean temperature of 16°C and mean DO of 6 mg/l at 12  
140 m while on the northwestern side, Punta Prieta has waters that are typically 3°C warmer and mean  
141 DO of 7.5 mg/l (Boch *et al.*, 2018) at the same depth. Because of the economic and ecological  
142 importance of abalone, the fishing cooperative, Buzos Y Pescadores, in Isla Natividad established  
143 2 marine reserves that have been monitored since 2006 (Boch *et al.*, 2018; Micheli *et al.*, 2012).  
144 One of the marine reserves is located near Punta Prieta and has oceanographic sensors (CTDs,  
145 MiniDOTs, thermistors, and adps) at 7 m and 12 m depth (Boch *et al.*, 2018).

146

147

148

149



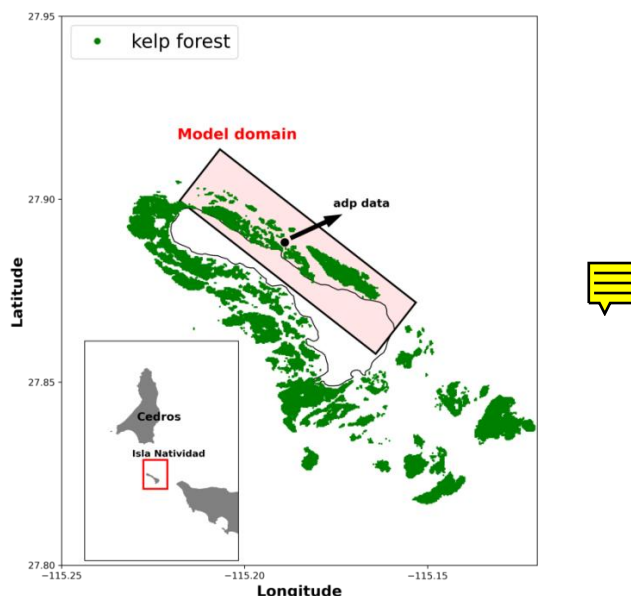

150

151 Figure 3 - Map of Isla Natividad indicating regional location and areas covered with kelp. Black circle  
152 indicates location of adp data used in this study. Punta Prieta, on the northeastern side of Isla Natividad.

### 153 3.3 Forcing

154 The mooring at Punta Prieta (Fig. 3) was chosen for evaluating the vegetation models in  
155 *COAWST* for four reasons, a) long-term data are available (Woodson, 2018), b) a heat wave in  
156 2015-16 complete removal of kelp (Fig. 4) allowing understanding the environment without kelp  
157 (Monismith et al 2022), c) it is within a marine reserve thereby providing a relatively undisturbed  
158 habitat (Micheli *et al.*, 2012), and d) flows are generally tidal and alongshore in contrast to flows  
159 around Morro Prieto (Boch *et al.*, 2018).

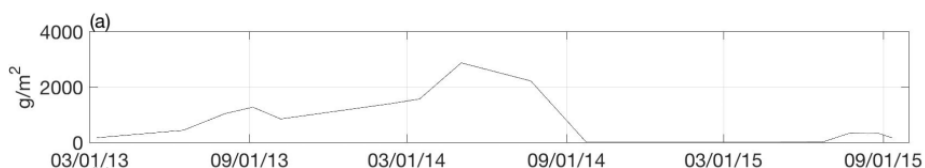

160

161 Figure 4 - Averaged kelp biomass around Isla Natividad, MX. Source: Monismith et al., 2022.



162

163 *In situ* current data were collected every 0.5 meter starting from 0.65 meters above the bottom to  
164 the surface (~14 m) from 2013-2016 using a 1MHz Nortek Aquadopp (*adp*; Fig. 3.5). The depth  
165 of the *adp* data used for this simulation was from 2.65-12.65 meters from the bottom to remove  
166 errors in the first couple of meters due to sidelobe interference (Lentz *et al.*, 2022). Depth-averaged  
167 velocities were calculated after removing errors from bottom and surface (Supplementary Fig. 1).  
168 Both E-W and N-S velocities increased in the 2015 period (Supplementary Fig. 1) when there was  
169 no kelp biomass observed (Fig. 4) while in 2014, the highest kelp biomass observed for the 2-1/2  
170 year record, velocities were ~2-fold slower (Monismith *et al.*, 2022).

171 Currents were rotated into along- and cross-shore axes using Principal Component Analysis  
172 (PCA; Campbell & Atchley 1981; Emery & Thompson 2004). The rotated velocities were  
173 separated by season (Fig. 5). Based on Fig. 4 and Fig. 5, the cross-shore and alongshore Winter  
174 2015 (henceforth *adp15*) and Spring 2014 (*adp14*) velocity records are used for no-kelp and kelp  
175 analyses. The *adp15* data set was used to validate *COAWST* without the vegetation module before  
176 implementing it for the *adp14* dataset (e.g., to estimate drag coefficients in the absence of kelp).

177

178

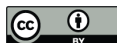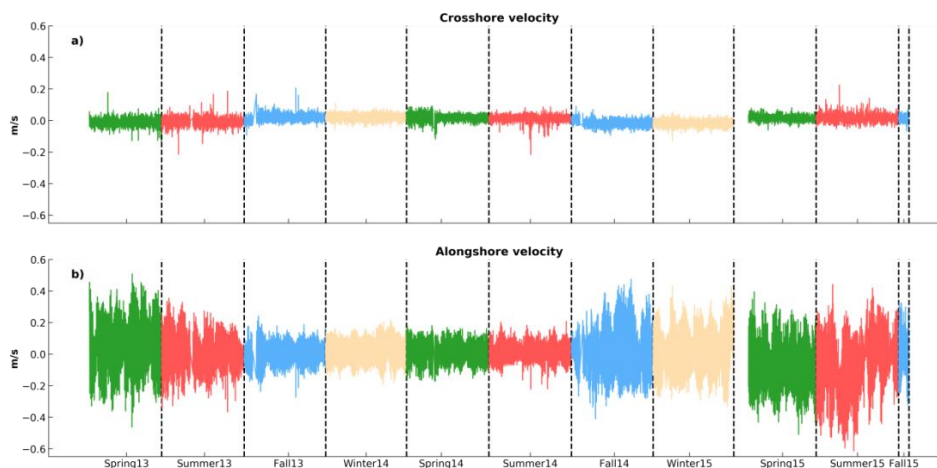

179

180

Figure 5 - Rotated cross-shore and alongshore velocities separated by season.

181

182 Both, cross-shore and alongshore velocities from adp15 and adp14 were harmonically analyzed  
183 using a python version of T-TIDE (Pawlociwick *et al.*, 2002; Figs. 3.7, 3.8) before being used to  
184 force *COAWST* and to validate the vegetation module, respectively.

### 185 3.4 Numerical Model Description

186 The model used in this study was the *Coupled Ocean-Atmosphere-Wave-Sediment-Transport*  
187 *model (COAWST V3.4; Warner et al., 2008)*. The ocean component of *COAWST* is the *Regional*  
188 *Ocean Modeling System (ROMS)* (Haidvogel *et al.*, 2008). ROMS is a 3-D, free-surface model  
189 that solves the primitive equations using hydrostatic and Boussinesq approximations with  
190 topography-following sigma layers (Shchepetkin and McWilliams, 2005; Haidvogel *et al.*, 2008).  
191 For the momentum equations, splines vertical advection and logarithmic bottom friction were  
192 selected to keep stability and better represent the environment, respectively. The model used the  
193 Mellor-Yamada level 2.5 turbulence closure scheme (MY-2.5). All boundaries (N,S,E,W) allowed  
194 along- and cross-shore flows. A periodic boundary condition was applied for free-surface, a Flather



195 condition for 2D u- and v-momentum, and a Radiation-Nudging condition for 3D u- and v-  
196 momentum.

197 The barotropic time-step was set at 10 s. Bottom roughness ( $z_{ob}$ ) was 0.03 m and surface  
198 roughness ( $z_{os}$ ) was 0.4 m with a no-slip condition along the bottom to provide a best fit for the  
199 no-kelp simulations to observed velocity profiles. The model had 40 sigma-layers splitting the 13  
200 meters of water column with surface stretching ( $\theta_s$ ) = 1, bottom stretching ( $\theta_b$ ) = 2, and thermocline  
201 depth (Tcline) = 0. The domain was approximately 14 km long by 3 km wide (Fig. 6) with a grid  
202 size of 25 meters x 25 meters. The model was initialized at rest with a well-mixed domain where  
203 temperature and salinity are 19°C and 34, respectively (Low *et al.*, 2021). The model was forced  
204 every 10 min with depth-averaged tidal fits from adp15 (Monismith *et al.*, 2022). Hydrodynamic  
205 conditions of the domain were simulated for three months. However, the first 30 days provided  
206 dynamic adjustment of the currents. The vegetation module was activated, accounting for the drag  
207 due to the kelp forests in the simulations using the *standard* and *canopy* modules (Beudin *et al.*,  
208 2017), and the flexibility flag (VEG\_FLEX) was turned off for both scenarios. Results are  
209 presented for the second month of each simulation.

210

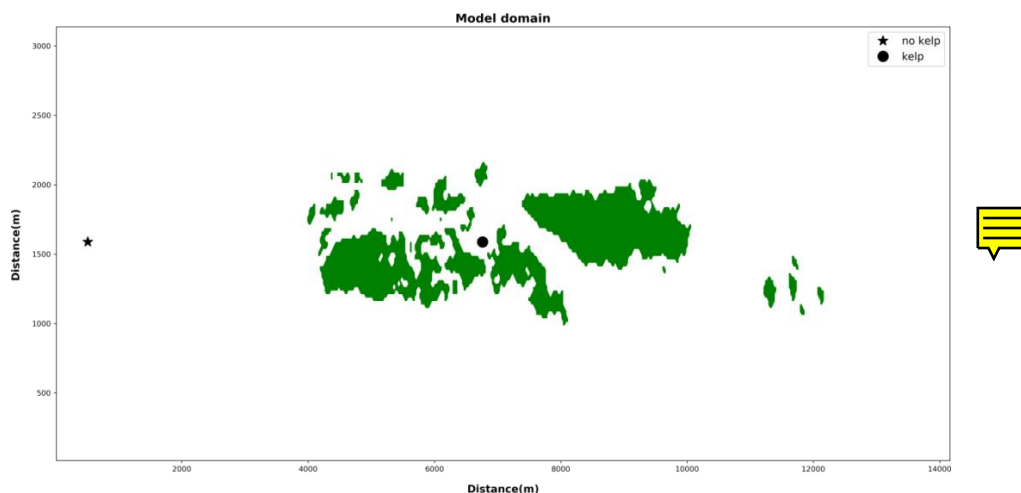

211

212 Figure 6 - Model domain. No kelp station (star) is used to validate the idealized model and kelp station  
213 (circle) is used to validate the vegetation module in *COAWST*.

214

### 215 3.5 Vegetation module parameters

216 The vegetation module is a standard component in *COAWST* (Beudin *et al.*, 2017). This module  
217 receives  $u$  and  $v$  from *ROMS* and returns both the drag force ( $F_d$ ) and vertical turbulent mixing  
218 (Beudin *et al.*, 2017). The vegetation module requires 4 parameters: plant height (m), plant density  
219 (plants/m<sup>2</sup>), plant diameter (m), and plant thickness (m) (Table 1). The other settings are number  
220 of vegetation types, Young's modulus ( $10^7$ ), vegetation mass density (1000.0), additional  
221 horizontal viscosity coefficient (0.0), and drag coefficient for each individual plant (0.05-0.6).

222

223

224

225

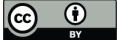

226 Table 1 - Vegetation module initial parameters.

|                 | Plant height(m) | Plant Density<br>(plants/m <sup>2</sup> ) | Plant diameter (m) | Plant thickness (m) |
|-----------------|-----------------|-------------------------------------------|--------------------|---------------------|
| <b>Standard</b> | 13              | 0.9*                                      | 0.3                | 0.3                 |
| <b>Canopy</b>   |                 |                                           | See equation 3     | See equation 3      |

227 \*(GAYLORD *et al.*, 2007).

### 228 3.6 Time-averaged velocity

229 The output velocity data were used to calculate the time-averaged velocity ( $\bar{u}$ ). To compute  $\bar{u}$ ,  
 230 alongshore and cross-shore velocities were used to calculate velocity component in the domain,  
 231 and then, integrated in time:

$$232 \quad |V| = \sqrt{\bar{u}^2 + \bar{v}^2} \quad (4)$$

$$233 \quad \bar{u} = \frac{1}{T} \int_0^T u dt \quad (5)$$

### 234 3.7 Model Skill

235 A quantitative model skill was presented by Willmott (1981) (eq. 6):

$$236 \quad WS = 1 - \frac{\sum_{i=1}^N (m_i - o_i)^2}{\sum_{i=1}^N (|m_i - \bar{o}| + |o_i - \bar{o}|)^2} \quad (6)$$

237 where  $m$  is the variable modeled being compared against the observed variable ( $o$ ), the index  $i$   
 238 represents each depth for our case. It takes the sum of difference for each point squared and divides  
 239 by sum of the absolute variability of the model and observed variable in relation to the mean of  
 240 the observed variable squared. A Willmott Skill equal to 0 ( $WS = 0$ ), means complete  
 241 disagreement, and,  $WS = 1$  means exact match between simulations and observations. This

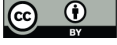

242 verification has been applied in other model simulations (Warner *et al.*, 2005b; Liu *et al.*, 2009).  
243 Before calculating *WS*, the model was interpolated to the depths of the *adp* dataset. Time-averaged  
244 velocities for the domain with the vegetation module off and the *no kelp station* (Fig. 6) were the  
245 same, and therefore, we used *no kelp station* for the validation. The *kelp station* (Fig. 6) was used  
246 and compared against *adp14* where kelp biomass was the highest (Fig. 4).

### 247 3.8 Bulk Drag calculations

248 Field estimates of kelp forest drag coefficients represent the bulk drag effect of multiple kelp  
249 plants. For example, in a 1-D linear momentum balance,

$$250 \quad \frac{\partial u}{\partial t} + C_D^B \frac{U|U|}{h} = -g \frac{\partial \eta}{\partial x} \quad (7)$$

251 After some manipulation:

$$252 \quad C_D^B = -\frac{h(\frac{\partial u}{\partial t} + \frac{\partial \eta}{\partial x})}{U|U|} \quad (8)$$

253 Applying the centered difference method for  $\frac{\partial u}{\partial t}$  and  $\frac{\partial \eta}{\partial x}$ , yields:

$$254 \quad C_D^B = \frac{-\frac{h}{2\Delta t}(u_j^{t+1} - u_j^{t-1}) - \frac{hg}{2\Delta t}(\eta_{j+1}^t - \eta_{j-1}^t)}{\bar{u}|\bar{u}|} \quad (9)$$

255  
256 The bulk drag coefficient,  $C_D^B$  (eq. 9), is the net coefficient for the entire region of influence, which  
257 is not necessarily the drag force on an individual kelp plant,  $C_D^i$ . In the *COAWST* model, the drag  
258 coefficient input is for an individual plant,  $C_D^i$ . Therefore, to evaluate model input, we changed  $C_D^i$   
259 and used the model to estimate  $C_D^B$ . Computing  $C_D^B$  does two things, 1) shows that the drag on a  
260 individual kelp plant is not the same as the bulk drag coefficient, and 2) allow us to parameterize  
261 the kelp model. In total, there were 12 simulations varying  $C_D^i$  from 0.05 to 0.6. A threshold for



262 velocities less than 0.05 m/s was imposed in order to get reasonable estimates of  $C_D^B$  during  
263 calculations.

### 264 3.9 Turbulent Kinetic Energy (TKE)

265 Turbulent kinetic Energy (TKE) is generally described by the intensity of the turbulent motion.  
266 The nearshore environment is believed to be an important region that dissipates TKE (Carter *et*  
267 *al.*, 2005). Like bottom boundary conditions in a nearshore environment, vegetation also increases  
268 TKE (Rosman *et al.*, 2010; Kalra *et al.*, 2017). For example, a laboratory study demonstrated that  
269 while kelp increased TKE in the water column when compared to no kelp, the largest turbulence  
270 occurred when the kelp had a dense surface canopy (Rosman *et al.*, 2010). TKE was calculated by  
271 *ROMS* and normalized by the total velocity. The TKE calculation was computed only for a cross-  
272 section area where kelp forest region was present.

## 273 4 RESULTS

274 Before starting the analysis of the kelp forest model, the model needs to adjust to a stable  
275 condition using a spin-up period to remove transient dynamics due to initial startup. For this  
276 simulation, we use sea surface elevation as the spin-up variable (Fig. 7). Because the no kelp  
277 simulation only has alongshore and cross-shore velocities as forcings, the period needed to  
278 stabilize was a little less than a month (Fig. 7-a), when kelp was added the spin-up period increased  
279 to closer to a month (Fig. 7-b). The amplitude of the sea surface height (SSH) stayed at 0.02 m and  
280 0.001 m for no kelp and vegetation module on, respectively. There was no difference in SSH  
281 amplitude and time for the system to stabilize for both simulations *standard* and *canopy*. When  
282 the vegetation module is added, SSH amplitude decreases, representing up to 40% reduction in  
283 amplitude.

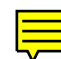





284

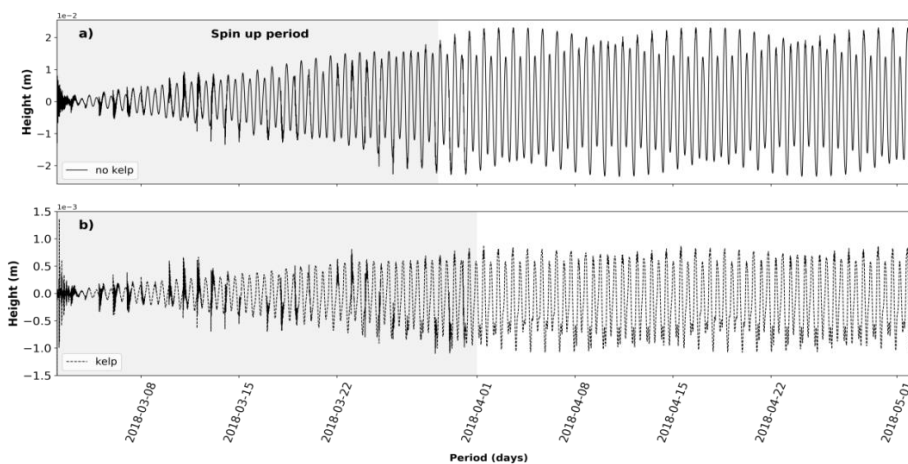

285

286 Figure 7 - Spin-up of the model domain for no kelp and inside kelp.

287

288 For the remaining analysis, the model was interpolated to the points of the *adp* dataset. The no  
289 kelp model showed good agreement with *adp15* (Fig. 8). Validation of the time-averaged currents  
290 was only possible up to 10.15 m from the bottom due to invalid values measured by the *adp15*  
291 instrument. The model overestimated the velocity over the first 4 m, underestimated it up to 9 m,  
292 and overestimated for the remainder of the data available. The absolute maximum difference was  
293 0.008 m/s between model velocity and those observed at 6 m. The skill for the time-averaged  
294 velocity in the no kelp model run compared to *adp15* was 98.8%. A high *WS* indicates a good  
295 agreement with the variability of the observed dataset.

296

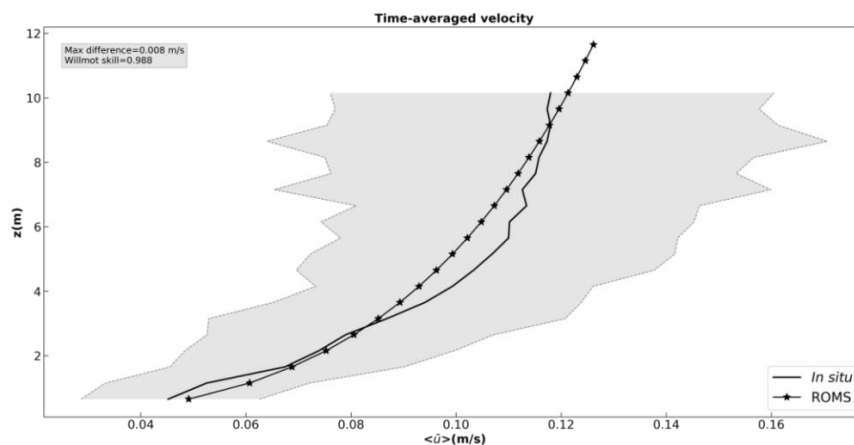

297

298 Figure 8 - Time-averaged profile comparison between *adp* data and model run without *vegetation* model.

299 The gray region shows the 95% CI and mostly represents variation in velocity due to tides. Y-axis is above  
300 the bottom.

301

302 For both configurations with kelp, modeled time-averaged velocities decreased with increased  
303  $C_{d,veg}$  as expected (Fig. 9). The *standard* configuration showed a slightly higher time-averaged  
304 velocity than *canopy* throughout all case scenarios. This difference was more pronounced in the  
305 last 4 m to the surface.  $C_{d,veg}$  was a way to change the fit of the velocities in the kelp simulation.  
306 Changes of 0.05 for  $C_{d,veg}$  were considered a safe and fast approach to fit the best scenario while  
307 not having to simulate too many scenarios. The best fit scenarios were  $C_{d,veg} = 0.35$  (Fig. 9-g) and  
308  $C_{d,veg} = 0.4$  (Fig. 9-h) for the *canopy* and *standard* models, respectively. At  $C_{d,veg} = 0.35$ , the  
309 *standard* model provided a better fit between 7-9 m than the *canopy* but overestimated everywhere  
310 else compared to the new model. This was different for the  $C_{d,veg} = 0.4$  scenario. While the *canopy*  
311 model showed a slightly better fit in the first 5 meters from the bottom, the overall best fit was  
312 modeled using the *standard* approach. The higher value for the *standard* module also represents  
313 the effect of not applying the effects of the kelp canopy over the entire water column.

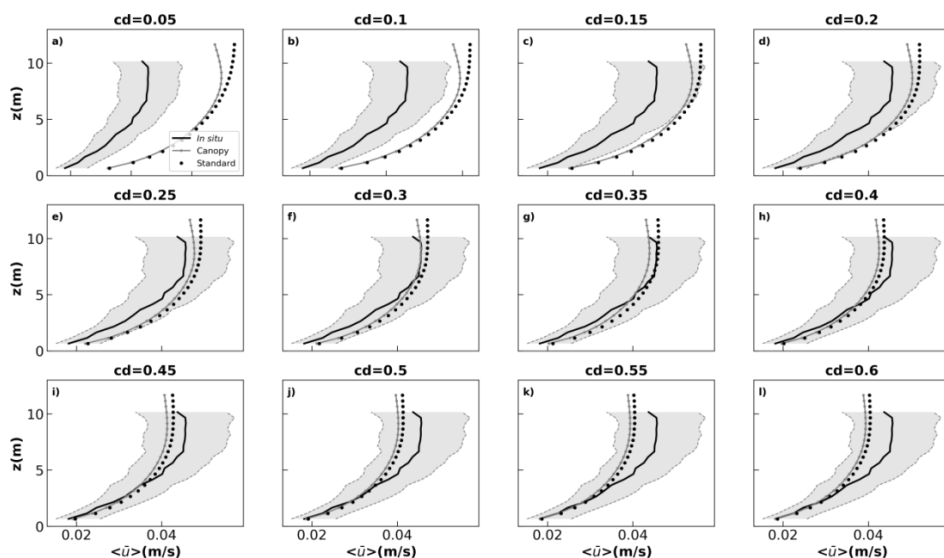

314

315 Figure 9 - Time-averaged profiles comparison between *adp* data and for standard and canopy. The gray  
 316 region shows the 95% CI for the effects of the tides. Y-axis is above the bottom.

317

318 Table 2 shows *WS* calculated for the best  $C_{d,veg}$  of each configuration. The water column was  
 319 divided into upper and lower regions for this assessment to understand the impact of the code  
 320 modification but also assess over the entire water column to check the overall fit. The division at  
 321 5 m was done because the *in-situ* data only extends to 10 m. Over the entire water column *WS* was  
 322 similar. Between the two regions, both simulations had greatest skill in the first 5 m which is  
 323 observable in Fig. 9g-h. The *standard* model was slightly better near the bottom. The largest  
 324 difference was observed in the upper 5 m, where *canopy* model had the most skill ( $WS = 0.767$ ).  
 325 This difference is due to a slightly better fit between 5-6 m and between 8-9 m, where the velocity  
 326 still feels the canopy acting on the surface velocities.

327



328 Table 2 - WS for the two best vegetation drag for both standard and canopy models.

|                 | <i>top</i> * | <i>down</i> ** | <i>total</i> *** |
|-----------------|--------------|----------------|------------------|
| <i>Standard</i> | 0.721        | 0.972          | 0.983            |
| <i>Canopy</i>   | 0.767        | 0.967          | 0.983            |

329 \* Calculated using values where depth is greater than 5. \*\* Calculated using values where depth is less or equal 5. \*\*\* Calculated for all the water  
330 column.

331

332 *WS* scores separated by 0.01 m/s bins are shown in Fig. 10. Both *canopy* and *standard* simulate  
333 similar along- and cross-shore velocities when compared against *in situ* datasets. *WS* values range  
334 from 0.25-0.93 for alongshore velocities (Fig. 10a) and 0.19-0.47 for cross-shore velocities (Fig.  
335 10b). As expected, alongshore *WS* showed better comparison than cross-shore. One possible  
336 reason is that cross-shore velocities at the Punta Prieta site are also affected by internal waves and  
337 tides, while surface tides dominate alongshore velocities. As a result, alongshore velocities  
338 compare better with observations at higher velocities than velocities closer to zero where there can  
339 be more uncertainty in both the model and measured velocities. Cross-shore velocities are best  
340 simulated between 0.04 and 0.05 m/s.

341

342

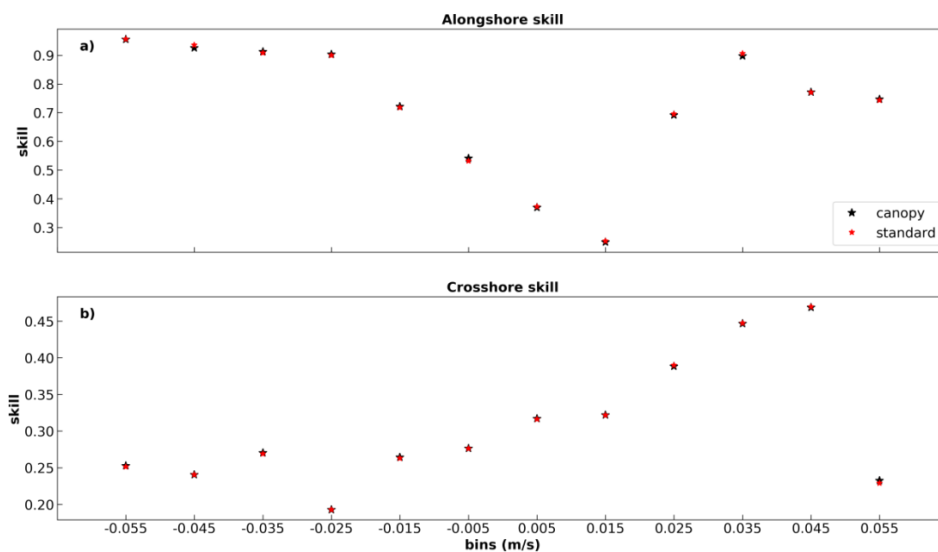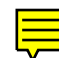

343

344 Figure 10 - WS for alongshore (a) and crossshore (b) for canopy and standard simulations split by 0.01 m/s  
345 bins.

346 Median bulk drag ( $C_D^B$ ) increased as vegetation drag ( $C_{d,veg}$ ) increased for both simulations (Table  
347 3). The variability also increases as  $C_{d,veg}$  becomes large. The  $C_D^B$  calculated for *canopy* is slightly  
348 larger for all  $C_{d,veg}$  used.  $C_D^B$  for the best simulations were the same 0.084 and had the same  
349 variability  $\pm 0.072$ . These values are within the values for dense kelp forests ( $C_D^B = 0.18$ ) and sparse  
350 kelp forests ( $C_D^B = 0.07$ ) in a laboratory study (Rosman *et al.*, 2010). The values were also in  
351 agreement with Monismith *et al.*, (2022) for the *adp15* data used for this simulation ( $C_D^B \sim 0.04$ ).

352

353

354

355

356



357 Table 3 - Median bulk drag coefficient and 95% CI calculated from **equation 7** for *standard* and *canopy*.  
 358

|                                      | $C_{d_{veg}} = 0.05$ | $C_{d_{veg}} = 0.10$ | $C_{d_{veg}} = 0.15$ | $C_{d_{veg}} = 0.20$ | $C_{d_{veg}} = 0.25$ | $C_{d_{veg}} = 0.30$ | $C_{d_{veg}} = 0.35$         | $C_{d_{veg}} = 0.40$         | $C_{d_{veg}} = 0.45$ | $C_{d_{veg}} = 0.50$ | $C_{d_{veg}} = 0.55$ | $C_{d_{veg}} = 0.60$ |
|--------------------------------------|----------------------|----------------------|----------------------|----------------------|----------------------|----------------------|------------------------------|------------------------------|----------------------|----------------------|----------------------|----------------------|
| <b><i>Standard</i></b> <sub>cd</sub> | .032±<br>0.016       | .048±<br>0.028       | .060±<br>0.037       | .067±<br>0.045       | .073±<br>0.052       | .078±<br>0.059       | .082±<br>0.065               | <b>.084±</b><br><b>0.072</b> | .087±<br>0.078       | .090±<br>0.084       | .092±<br>0.090       | .095±<br>0.093       |
| <b><i>Canopy</i></b> <sub>cd</sub>   | .036±<br>0.018       | .052±<br>0.030       | .064±<br>0.040       | .071±<br>0.048       | .077±<br>0.056       | .081±<br>0.063       | <b>.084±</b><br><b>0.070</b> | .087±<br>0.077               | .090±<br>0.085       | .093±<br>0.091       | .096±<br>0.094       | .098±<br>0.094       |

359

360 The estimates of bulk drag ( $C_D^B$ ) improves as Reynolds number (Re) increases (Fig. 11). Depth-  
 361 averaged velocity was binned from 0.01 m/s to 0.09 m/s with 0.01m/s intervals.  $C_D^B$  also has a Re  
 362 dependency as expected. The medians for the two models are not statistically different. The  $C_D^B$   
 363 estimations are higher and less precise for smaller Re values (e.g:  $10^{5.5}$  to  $10^{5.8}$ ), and as the depth-  
 364 averaged velocity increases bulk drag estimates are closer to what has been observed in the  
 365 literature (Rosman *et al.*, 2010; Monismith *et al.*, 2022).

366 While the time-averaged profiles and bulk drag estimation are similar between both models, the  
 367 difference in the mean velocity and its variability observed from the last two meters to the surface  
 368 is quite different (Fig. 12). Overall, the largest differences are on the edges of the kelp forest region.  
 369 The *standard* model had higher velocity and variability than *canopy* model in the last 2 m near the  
 370 surface (Fig. 12a-b), resulting from the addition of kelp canopy in the latter model. *Canopy* had  
 371 slightly higher velocity just below the kelp canopy especially on the edges (Fig. 12a). This decrease  
 372 in time-averaged velocity at the surface and an increase at the bottom has been previously observed  
 373 in laboratory for dense kelp with canopy (Rosman *et al.*, 2010; Rosman *et al.*, 2013).

374

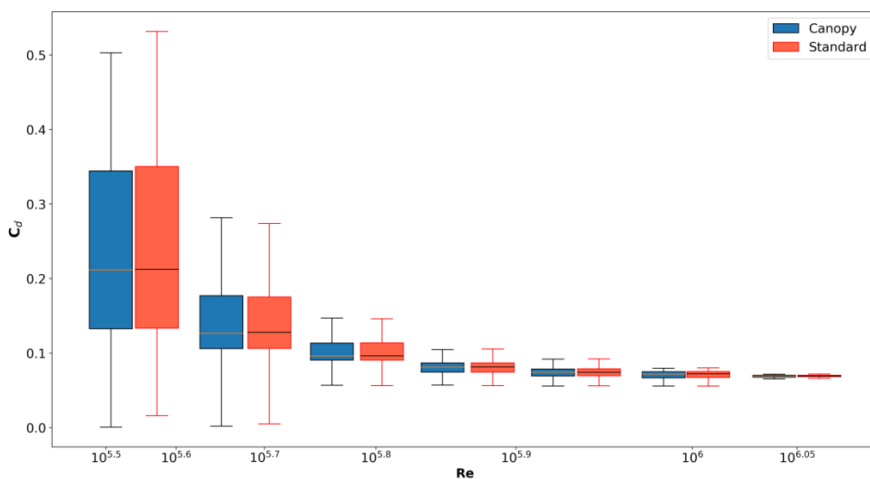

375

376 Figure 11 - Bulk drag versus Reynolds number for depth-averaged velocities at each 0.01m/s interval for  
377 both canopy and standard.

378

379

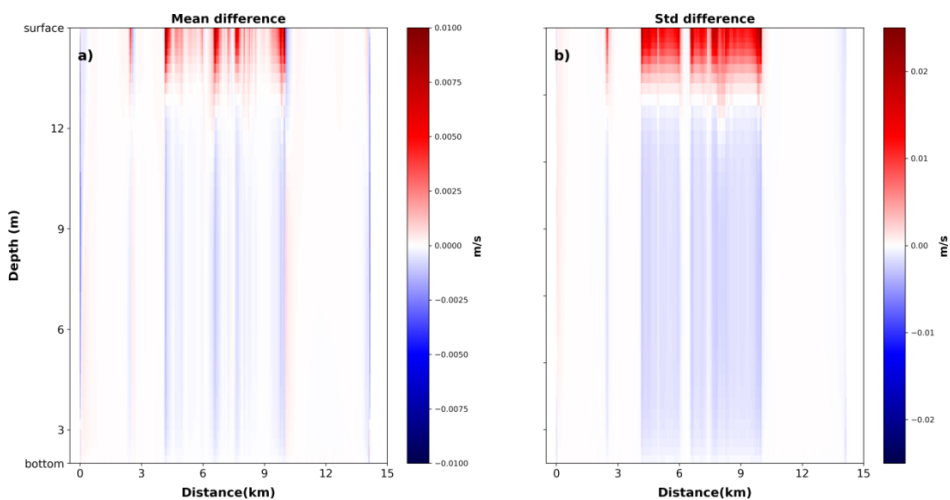

380

381 Figure 12 - Mean (a) and standard deviation (b) of velocities difference between standard and canopy.  
382 Alongshore slice at 1500m.

383



384 Absolute time-averaged cross-shore (Fig. 13a) and alongshore (Fig. 13b) velocities for the  
385 canopy simulation illustrate the ducting of flow around patches of kelp (Valle-Levinson et al  
386 2022). Velocities in the kelp were disregarded, and where kelps are present in the model are shown  
387 in brown. There is an increase in mean time-averaged cross-shore speed along the outer and inner  
388 edges of the kelp forest (Fig. 13a). The highest absolute cross-shore velocities are located between  
389 kelp forests at 6.8 and 7.4 km. Flow acceleration along the edges of kelp forests has been  
390 previously observed (Jackson & Winant, 1983; Jackson, 1998; Graham, 2003). In addition, the  
391 flow channeling between kelp gaps has been described recently for the same region (Valle-  
392 Levinson *et al.*, 2022). The absolute time-averaged alongshore speeds decrease to almost zero  
393 between 1 and 1.5 km (Fig. 13b). The giant patch in front of this section is the cause of these  
394 velocities being almost null. The alongshore section shows flow channeling between 1.5 and 2 km.  
395 Flow channeling is stronger closer to the 2 km region and for depths between 8.5 m and the surface.  
396 Velocities are higher on the outer edge (approximately at 2.2 km) where there is no large patch  
397 that inhibits flows in that area. As a result, our model could also be applied to understand the  
398 effects on nutrient uptake (Gaylord *et al.*, 2007), larvae dispersal (Graham, 2003), and connectivity  
399 among beds (Gaylord *et al.*, 2006). In addition, Valle-Levinson *et al.*, (2022) hypothesized that  
400 these regions could provide localized sites of fertilization and safe spaces for various species.

401



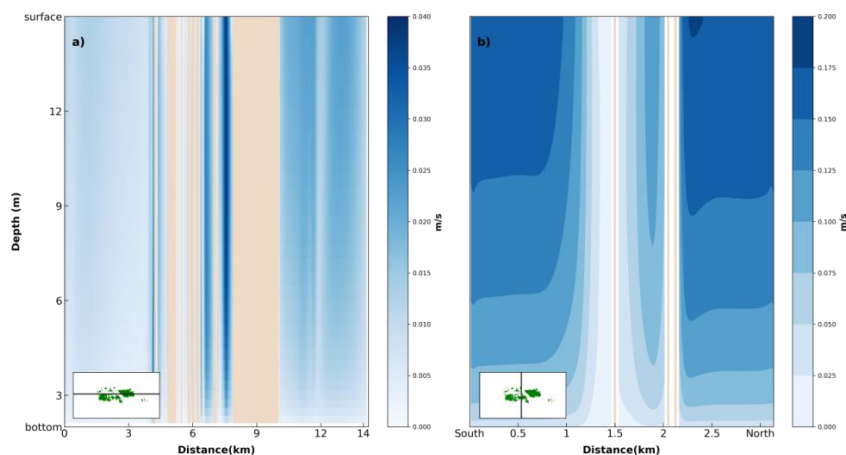

402

403 Figure 13 - Absolute time-averaged cross-shore (a) and alongshore (b) velocities for canopy module  
404 simulation. Brown region indicates where kelp forest module is present in the model.

405

406 Profiles of normalized TKE (hereafter TKE) for *standard*, *canopy*, and canopy with 50%  
407 coverage (instead of 100%) at the surface (*canopy50*) further illustrate the effects of kelp canopy  
408 on flows (Fig. 14). TKE was relatively the same from 0.5 m up to 7 m above the bottom for both  
409 the *standard* and *canopy* models. The *standard* profile is close to a linear function as expected for  
410 free surface flows. Similar mean TKE profiles were observed for no kelp and no canopy scenarios  
411 in a laboratory experiment (Rosman *et al.*, 2010). The *canopy* simulation showed a TKE peak 2-  
412 fold higher than Rosman *et al.* (2010) while *canopy50* showed values similar to this laboratory  
413 study for a dense canopy scenario. We believe this is because of the spacing at the surface in the  
414 *canopy* scenario acting as almost a solid boundary at the surface generating more friction, and  
415 therefore, more TKE. While the profiles in the Rosman *et al.* (2010) do not show the bump  
416 observed in the simulations, we observed that the peaks, for both sparse and dense with kelp fronds,  
417 are always deeper than the actual kelp fronds located at the surface which is also observed in both  
418 simulations *canopy* and *canopy50*. TKE then decreases within the canopy.

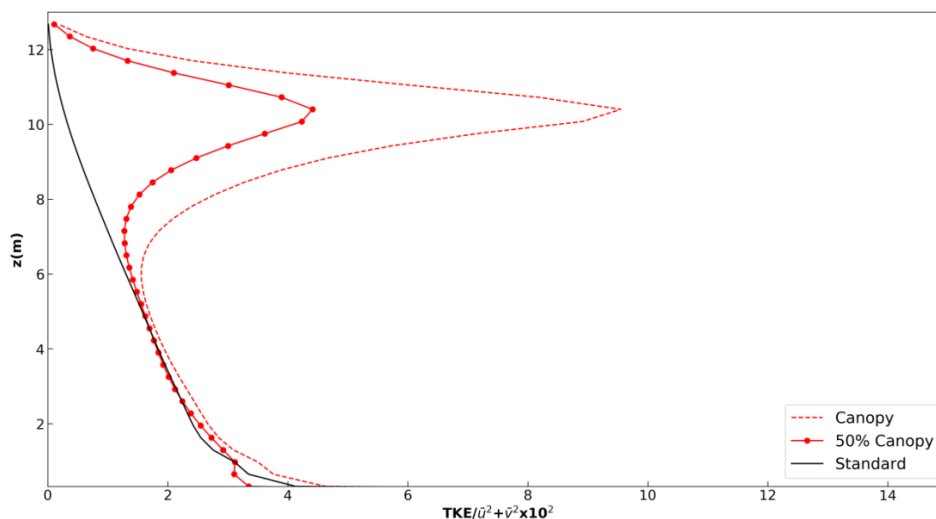

419

420 Figure 14 - Averaged normalized TKE only in the kelp forest region. Alongshore slice at 1500m.

421

## 422 5 DISCUSSIONS

423 The Coupled Ocean-Atmosphere-Wave-Sediment transport (*COAWST*) modeling system has  
424 been successfully applied to characterize wave-flow-seagrass interactions (Beudin *et al.*, 2017).  
425 The new module described in this paper, expands *COAWST* capability to simulate flow-vegetation  
426 interactions for canopied vegetation, specifically kelp forests. This module not only simulates the  
427 time-averaged tidal-driven currents in the presence of kelp forests but also the wake (turbulent  
428 kinetic energy) generated by kelp fronds as observed in laboratory experiments (Rosman *et al.*,  
429 2010).

430 The influence of kelp forests on currents have been modeled previously (Wu *et al.*, 2017; Frieder  
431 *et al.*, 2022). However, these models did not explicitly account for the presence of a canopy or  
432 were run offline and thus did not provide feedback to the regional model. In this study, we  
433 implemented changes in flow and turbulence caused by kelp forests in a regional ocean model that

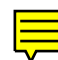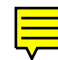



434 provide feedback on the flows themselves. This was possible because of the vegetation module  
435 developed by Beudin *et al.*, (2016) and our modified approach to simulate kelp canopy. In a  
436 previous study, the effects on currents by the drag generated due to kelp forests was only  
437 implemented at the bottom of the domain (Wu *et al.*, 2017). Like this study, they also observed  
438 damping in the tidal velocity for regions where kelp beds were present. The most recent study  
439 documenting kelp forest simulation (Frieder *et al.*, 2022) not only added the changes in the flows  
440 in the water column but also simulated growth and death of kelp forests, making their model more  
441 robust than the one present here for simulating kelp effects over longer time frames. However, the  
442 shortcoming of their model was that they used an offline Large Eddy Simulation (LES) forced by  
443 model outputs, and therefore, no direct feedback in the regional ocean model. While we understand  
444 our kelp forest simulation uses a static kelp forest domain and does not show a more realistic kelp  
445 forest seasonal cycle, it does represent well the domain when kelp density is zero and when kelp  
446 density is high (0.9 plants/m<sup>2</sup>). This module can be expanded to be used to understand the two way  
447 interaction between kelp forests, currents, and biogeochemistry, for example, and could be  
448 modified to vary parameters through time to account for growth and decay of kelp forests over  
449 seasonal and interannual cycles.

450 The module presented here shows good agreement for the time-averaged velocity at Punta Prieta  
451 for the 2015 period when kelp was absent (Monismith *et al.*, 2022). The differences observed  
452 mainly in the middle of the water column between our model and the *in situ* dataset could have  
453 been because the simulation was only forced with the two main tidal constituents for the domain  
454 and did not include wind and wave effects on currents (Monismith *et al.*, 2022). However, while  
455 the largest difference between model and *in situ* dataset occurs in the middle of the water column,  
456 we believe this difference could be due to two possible issues: a) model settings, for example, the

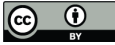

457 sigma layers being coarser in the middle of the water column, or b) not having a solid coast on the  
458 south boundary representing the island which could change the cross-shore velocities in the water  
459 column (Russell & Vennell, 2017). The upper 2 m of the water column cannot be compared due  
460 to *adp* instrument capabilities pointed out by Monismith *et al.*, (2022). This upper 2 m is strongly  
461 influenced by winds and waves that increase the velocity (see Fig. 7 in Monismith *et al.*, 2022)  
462 and for our case we did not consider these two other processes.

463 When kelp is present, time-averaged velocity profiles show a rapid decrease in the last meter to  
464 the surface. Neither the *standard* nor *canopy* modules captured the change in the last 2 m of the  
465 water column observed in the *in situ* datasets. When kelp is present at the Punta Prieta site, the  
466 velocities are wave-induced (Monismith *et al.*, 2022). This forcing is not imposed in the domain.  
467 Consequently, both models simulate similar patterns up to 10 meters by changing the vegetation  
468 drag by only 0.05. However, even if measurements for the last two meters are unreliable, we  
469 observe that the *in situ* data tends to slow down in the canopy region. The canopy region is formed  
470 due to the spread out of kelp fronds in the upper 2 m (Jackson, 1984), resulting in a dense region  
471 with larger drag than the rest of the kelp environment (Rosman *et al.*, 2010), almost like a semi-  
472 wall. Although, our *canopy* approach does not account for changes in kelp orientation with  
473 currents, it shows better results in the canopy region than the *standard* module (Fig. 12h).

474 The nearshore environment is believed to be a region that dissipates TKE (Carter *et al.*, 2005).  
475 Like bottom boundary conditions in a nearshore environment, vegetation increases TKE (Rosman  
476 *et al.*, 2010; Kalra *et al.*, 2017). For example, kelp forests significantly affect the various physical,  
477 chemistry, and biological processes due to the turbulence near the canopy region (Rosman *et al.*,  
478 2010). To our knowledge, this is the first time a hydrodynamic model was able to model TKE in  
479 the water column caused by canopies.



480 The density of *M. pyrifera* plants varies significantly throughout the year (Monismith *et al.*,  
481 2022). Reed *et al.*, (2009) found that the lowest densities were during the end of winter season  
482 while the highest were during summer. The same authors found that the spacing between canopies  
483 decrease to its minimum during fall and increase during winter. For our simulations, we found that  
484 plant density  $\sim 0.9$  plants  $m^{-2}$  (Gaylord *et al.*, 2007; Reed *et al.*, 2009) and *canopy50* produced the  
485 best scenario for summer periods, and therefore, the best fit to TKE estimates. Consequently, a  
486 study to develop a time-varying change in canopy spacing is needed to understand the impact of  
487 fronds for seasonal and yearly variability in kelp domains. Nonetheless, this new module opens  
488 opportunities to study how TKE affects nutrient availability (Rosman *et al.*, 2010), oxygen  
489 dynamics (Murie & Bourdeau, 2020), and larval transport (Pakhomov *et al.*, 2022) in kelp forest  
490 regions.

## 491 6 CONCLUSIONS

492 The *canopy* method presented in this paper to simulate kelp forests including the canopy is a  
493 new and relatively simple way to represent kelp forests in *COAWST*. The module modifies the  
494 plant thickness and plant diameter to decrease spacing in the last meter of the water column to  
495 mimic the effects of the kelp canopy. The revised module slightly improved fits to velocity and  
496 greatly improved fits to TKE depth profiles over the default vegetation module provided in  
497 *COAWST*. Although both the canopy and standard modules produced comparable time-averaged  
498 velocity profiles compared to the *in-situ* data, the presence of the kelp canopy resulted in a marked  
499 enhancement of turbulence near the surface. Such an improvement could considerably influence  
500 air-sea fluxes, biogeochemical processes, and the distribution of larvae within the kelp forest. This  
501 model provides improved opportunities to study the impacts of kelp forests around flows and can

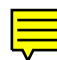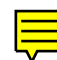



502 further be used to understand larvae dispersal and biogeochemistry in a kelp environment using  
503 hydrodynamic models.

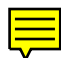

## 504 Code availability

505 The modified code for the **canopy** module and the codes to generate the data and figures are  
506 available at <https://doi.org/10.5281/zenodo.10160564> (Fagundes and Woodson, 2023). The  
507 COAWST V3.4 source code is available from <https://github.com/CSOMIO/COAWST> (last  
508 access: Nov, 27th, 2023)

## 509 Author contributions

510 C.B.W. designed the study. M.F. conducted model runs. M.F. and C.B.W. analyzed the data. F.M,  
511 S.G.M, A.V.L. contributed significantly with constructive feedback to the science and internal  
512 discussions of the manuscript.

## 513 Disclaimer

514 Publisher's note: Copernicus Publications remains neutral with regard to jurisdictional claims in  
515 published maps and institutional affiliations.

## 517 Competing interests

518 The contact author has declared that none of the authors has any competing interests

## 520 Acknowledgments

521 The gratefully acknowledge support by NSF grants.

## 523 Financial support

524 This research has been supported by National Science Foundation (grant nos. OCE-1416837,  
525 OCE-1737090, OCE 1736830, DISES 2108566, and RISE-2108566)

## 527 References

528  
529 Anderson, T. W. (1994). Role of macroalgal structure in the distribution and abundance of a  
530 temperate reef fish. *Marine ecology progress series*. Oldendorf, 113(3), 279-290.

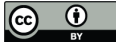

- 531 Beudin, A., Kalra, T. S., Ganju, N. K., & Warner, J. C. (2017). Development of a coupled wave-  
532 flow-vegetation interaction model. *Computers & Geosciences*, *100*, 76-86.
- 533 Boch, C. A., Micheli, F., AlNajjar, M., Monismith, S. G., Beers, J. M., Bonilla, J. C., ... &  
534 Woodson, C. B. (2018). Local oceanographic variability influences the performance of juvenile  
535 abalone under climate change. *Scientific reports*, *8*(1), 1-12.
- 536 Britton, D., Cornwall, C. E., Revill, A. T., Hurd, C. L., & Johnson, C. R. (2016). Ocean  
537 acidification reverses the positive effects of seawater pH fluctuations on growth and  
538 photosynthesis of the habitat-forming kelp, *Ecklonia radiata*. *Scientific reports*, *6*(1), 26036.
- 539 Campbell, N. A., & Atchley, W. R. (1981). The geometry of canonical variate analysis. *Systematic*  
540 *Biology*, *30*(3), 268-280.
- 541 Carter, G. S., Gregg, M. C., & Lien, R. C. (2005). Internal waves, solitary-like waves, and mixing  
542 on the Monterey Bay shelf. *Continental Shelf Research*, *25*(12-13), 1499-1520.
- 543 Cavanaugh, K. C., Reed, D. C., Bell, T. W., Castorani, M. C., & Beas-Luna, R. (2019). Spatial  
544 variability in the resistance and resilience of giant kelp in southern and Baja California to a  
545 multiyear heatwave. *Frontiers in Marine Science*, *6*, 413.
- 546 Dayton, P. K. (1985). Ecology of kelp communities. *Annual review of ecology and*  
547 *systematics*, *16*(1), 215-245.
- 548 Dayton, P. K., & Tegner, M. J. (1984). Catastrophic storms, El Niño, and patch stability in a  
549 southern California kelp community. *Science*, *224*(4646), 283-285.



- 550 Deza, A. A., & Anderson, T. W. (2010). Habitat fragmentation, patch size, and the recruitment  
551 and abundance of kelp forest fishes. *Marine Ecology Progress Series*, 416, 229-240.
- 552 Duarte, C. M. (2017). Reviews and syntheses: Hidden forests, the role of vegetated coastal habitats  
553 in the ocean carbon budget. *Biogeosciences*, 14(2), 301-310.
- 554 Eger, A. M., Marzinelli, E. M., Beas-Luna, R., Blain, C. O., Blamey, L. K., Byrnes, J. E., ... &  
555 Vergés, A. (2023). The value of ecosystem services in global marine kelp forests. *nature*  
556 *communications*, 14(1), 1894.
- 557 Fagundes, M., & Woodson, C. B. (2023). COAWST model files. Zenodo.  
558 <https://doi.org/10.5281/zenodo.10160564>
- 559
- 560 Gaylord, B., Reed, D. C., Raimondi, P. T., Washburn, L., & McLean, S. R. (2002). A physically  
561 based model of macroalgal spore dispersal in the wave and current-dominated  
562 nearshore. *Ecology*, 83(5), 1239-1251.
- 563 Gaylord, B., Rosman, J. H., Reed, D. C., Koseff, J. R., Fram, J., MacIntyre, S., ... & Mardian, B.  
564 (2007). Spatial patterns of flow and their modification within and around a giant kelp  
565 forest. *Limnology and Oceanography*, 52(5), 1838-1852.
- 566 Haidvogel, D. B., Arango, H., Budgell, W. P., Cornuelle, B. D., Curchitser, E., Di Lorenzo, E., ...  
567 & Wilkin, J. (2008). Ocean forecasting in terrain-following coordinates: Formulation and skill  
568 assessment of the Regional Ocean Modeling System. *Journal of computational physics*, 227(7),  
569 3595-3624.





- 570 Kalra, T. S., Aretxabaleta, A., Seshadri, P., Ganju, N. K., & Beudin, A. (2017). Sensitivity analysis  
571 of a coupled hydrodynamic-vegetation model using the effectively subsampled quadratures  
572 method (ESQM v5. 2). *Geoscientific Model Development*, 10(12), 4511-4523.
- 573 Ladah, L. B., Zertuche-González, J. A., & Hernández-Carmona, G. (1999). Giant kelp  
574 (*Macrocystis pyrifera*, Phaeophyceae) recruitment near its southern limit in Baja California after  
575 mass disappearance during ENSO 1997–1998. *Journal of Phycology*, 35(6), 1106-1112.
- 576 Leary, P. R., Woodson, C. B., Squibb, M. E., Denny, M. W., Monismith, S. G., & Micheli, F.  
577 (2017). “Internal tide pools” prolong kelp forest hypoxic events. *Limnology and*  
578 *Oceanography*, 62(6), 2864-2878.
- 579 Lentz, S. J., Kirincich, A., & Plueddemann, A. J. (2022). A note on the depth of sidelobe  
580 contamination in acoustic Doppler current profiles. *Journal of Atmospheric and Oceanic*  
581 *Technology*, 39(1), 31-35.
- 582 Liu, Y., MacCready, P., Hickey, B. M., Dever, E. P., Kosro, P. M., & Banas, N. S. (2009).  
583 Evaluation of a coastal ocean circulation model for the Columbia River plume in summer  
584 2004. *Journal of Geophysical Research: Oceans*, 114(C2).
- 585 Low, N. H., Micheli, F., Aguilar, J. D., Arce, D. R., Boch, C. A., Bonilla, J. C., ... & Woodson, C.  
586 B. (2021). Variable coastal hypoxia exposure and drivers across the southern California  
587 Current. *Scientific reports*, 11(1), 1-10.
- 588 Macreadie, P. I., Anton, A., Raven, J. A., Beaumont, N., Connolly, R. M., Friess, D. A., ... &  
589 Duarte, C. M. (2019). The future of Blue Carbon science. *Nature communications*, 10(1), 3998.



- 590 Mancilla-Peraza, M., Palacios-Hernández, E., & López-Castillo, G. (1993). Hydrographic  
591 Variability In Bahía Vizcaino, Baja California, Mexico. *Ciencias marinas*, 19(3), 265-284.
- 592 Mcleod, E., Chmura, G. L., Bouillon, S., Salm, R., Björk, M., Duarte, C. M., ... & Silliman, B. R.  
593 (2011). A blueprint for blue carbon: toward an improved understanding of the role of vegetated  
594 coastal habitats in sequestering CO<sub>2</sub>. *Frontiers in Ecology and the Environment*, 9(10), 552-560.
- 595 McPherson, M. L., Finger, D. J., Houskeeper, H. F., Bell, T. W., Carr, M. H., Rogers-Bennett, L.,  
596 & Kudela, R. M. (2021). Large-scale shift in the structure of a kelp forest ecosystem co-occurs  
597 with an epizootic and marine heatwave. *Communications biology*, 4(1), 298.
- 598 Micheli, F., Saenz-Arroyo, A., Greenley, A., Vazquez, L., Espinoza Montes, J. A., Rossetto, M.,  
599 & De Leo, G. A. (2012). Evidence that marine reserves enhance resilience to climatic  
600 impacts. *PloS one*, 7(7), e40832.
- 601 Monismith, S. G., Alnajjar, M. W., Woodson, C. B., Boch, C. A., Hernandez, A., Vazquez-Vera,  
602 L., ... & Micheli, F. (2022a). Influence of kelp forest biomass on nearshore currents. *Journal of*  
603 *Geophysical Research: Oceans*, 127(7), e2021JC018333.
- 604 Monismith, S., Alnajjar, M., Daly, M., Valle-Levinson, A., Juarez, B., Fagundes, M., ... &  
605 Woodson, C. B. (2022b). Kelp forest drag coefficients derived from tidal flow data. *Estuaries and*  
606 *Coasts*, 45(8), 2492-2503.
- 607 Murie, K. A., & Bourdeau, P. E. (2020). Fragmented kelp forest canopies retain their ability to  
608 alter local seawater chemistry. *Scientific reports*, 10(1), 11939.



- 609 Pakhomov, E., Kaehler, S., & McQuaid, C. (2002). Zooplankton community structure in the kelp  
610 beds of the sub-Antarctic Prince Edward Archipelago: are they a refuge for larval stages?. *Polar*  
611 *Biology*, 25, 778-788.
- 612 Pawlowicz, R., Beardsley, B., & Lentz, S. (2002). Classical tidal harmonic analysis including error  
613 estimates in MATLAB using T\_TIDE. *Computers & geosciences*, 28(8), 929-937.
- 614 Raffaelli, D., & Hawkins, S. J. (1996). *Intertidal ecology*. Springer Science & Business Media.
- 615 Reed, D., Rassweiler, A., & Arkema, K. (2009). Density derived estimates of standing crop and  
616 net primary production in the giant kelp *Macrocystis pyrifera*. *Marine Biology*, 156, 2077-2083.
- 617 Rosman, J. H., Koseff, J. R., Monismith, S. G., & Grover, J. (2007). A field investigation into the  
618 effects of a kelp forest (*Macrocystis pyrifera*) on coastal hydrodynamics and transport. *Journal of*  
619 *Geophysical Research: Oceans*, 112(C2).
- 620 Rosman, J. H., Monismith, S. G., Denny, M. W., & Koseff, J. R. (2010). Currents and turbulence  
621 within a kelp forest (*Macrocystis pyrifera*): Insights from a dynamically scaled laboratory  
622 model. *Limnology and Oceanography*, 55(3), 1145-1158.
- 623 Rosman, J. H., Denny, M. W., Zeller, R. B., Monismith, S. G., & Koseff, J. R. (2013). Interaction  
624 of waves and currents with kelp forests (*Macrocystis pyrifera*): Insights from a dynamically scaled  
625 laboratory model. *Limnology and Oceanography*, 58(3), 790-802.

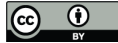

- 626 Russell, P., & Vennell, R. (2017). High-resolution observations of secondary circulation and  
627 tidally synchronized upwelling around a coastal headland. *Journal of Geophysical Research:*  
628 *Oceans*, 122(2), 890-913.
- 629 Shchepetkin, A. F., & McWilliams, J. C. (2005). The regional oceanic modeling system (ROMS):  
630 a split-explicit, free-surface, topography-following-coordinate oceanic model. *Ocean*  
631 *modelling*, 9(4), 347-404.
- 632 Schlenger, A. J., Beas-Luna, R., & Ambrose, R. F. (2021). Forecasting ocean acidification impacts  
633 on kelp forest ecosystems. *PLoS one*, 16(4), e0236218.
- 634 Schiel, D. R., & Foster, M. S. (2015). *The biology and ecology of giant kelp forests*. Univ of  
635 California Press.
- 636 Steneck, R. S., Graham, M. H., Bourque, B. J., Corbett, D., Erlandson, J. M., Estes, J. A., & Tegner,  
637 M. J. (2002). Kelp forest ecosystems: biodiversity, stability, resilience and future. *Environmental*  
638 *conservation*, 29(4), 436-459.
- 639 Thomson, R. E., & Emery, W. J. (2014). *Data analysis methods in physical oceanography*.  
640 Newnes.
- 641 Traiger, S. B., Cohn, B., Panos, D., Daly, M., Hirsh, H. K., Martone, M., ... & Nickols, K. J. (2022).  
642 Limited biogeochemical modification of surface waters by kelp forest canopies: Influence of kelp  
643 metabolism and site-specific hydrodynamics. *Limnology and Oceanography*, 67(2), 392-403.



- 644 Trenberth, K. E. (1997). The definition of el nino. *Bulletin of the American Meteorological*  
645 *Society*, 78(12), 2771-2778.
- 646 Utter, B. D., & Denny, M. W. (1996). Wave-induced forces on the giant kelp *Macrocystis pyrifera*  
647 (Agardh): field test of a computational model. *Journal of experimental Biology*, 199(12), 2645-  
648 2654.
- 649 Valle-Levinson, A., Daly, M. A., Juarez, B., Tenorio-Fernandez, L., Fagundes, M., Woodson, C.  
650 B., & Monismith, S. G. (2022). Influence of kelp forests on flow around headlands. *Science of the*  
651 *Total Environment*, 825, 153952.
- 652 Warner, J. C., Geyer, W. R., & Lerczak, J. A. (2005). Numerical modeling of an estuary: A  
653 comprehensive skill assessment. *Journal of Geophysical Research: Oceans*, 110(C5).
- 654 Warner, J. C., Sherwood, C. R., Signell, R. P., Harris, C. K., & Arango, H. G. (2008). Development  
655 of a three-dimensional, regional, coupled wave, current, and sediment-transport model. *Computers*  
656 *& geosciences*, 34(10), 1284-1306.
- 657 Walter, R. K., Woodson, C. B., Arthur, R. S., Fringer, O. B., & Monismith, S. G. (2012). Nearshore  
658 internal bores and turbulent mixing in southern Monterey Bay. *Journal of Geophysical Research:*  
659 *Oceans*, 117(C7).
- 660 Wernberg, T., Krumhansl, K., Filbee-Dexter, K., & Pedersen, M. F. (2019). Status and trends for  
661 the world's kelp forests. In *World seas: An environmental evaluation* (pp. 57-78). Academic Press
- 662 Willmott, C. J. (1981). On the validation of models. *Physical geography*, 2(2), 184-194.

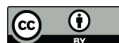

663 Woodson, C. B. (2018). The fate and impact of internal waves in nearshore ecosystems. *Annual*  
664 *review of marine science*, 10, 421-441.

665 Wu, Y., Hannah, C. G., O'Flaherty-Sproul, M., & Thupaki, P. (2017). Representing kelp forests in  
666 a tidal circulation model. *Journal of Marine Systems*, 169, 73-86.

667

668
